# Supplementary material for: Bis-Bibenzyls from the Liverwort Pellia endiviifolia and Their Biological Activity
Source: MDPI journal article supplement (doi:10.3390/plants10061063), 2021-05-26
Supplement: s1 [file s1]

## Supplementary Material

### **Bis-bibenzyls from the liverwort *Pellia endiviifolia* and their biological activity**

Ivana Ivković<sup>1</sup>, Miroslav Novaković<sup>2</sup>, Milan Veljić<sup>1</sup>, Marija Mojsin<sup>3</sup>, Milena Stevanović<sup>3,4,5</sup>,  
Petar D. Marin<sup>1</sup>, Danka Bukvički<sup>1,\*</sup>

<sup>1</sup>*University of Belgrade, Faculty of Biology, Institute of Botany and Botanical Garden  
“Jevremovac”, 11000 Belgrade, Serbia.*

<sup>2</sup>*University of Belgrade, Institute of Chemistry Technology and Metallurgy, Department of  
Chemistry, 11 000 Belgrade, Serbia.*

<sup>3</sup>*University of Belgrade, Institute of Molecular Genetics and Genetic Engineering, 11042  
Belgrade, Serbia.*

<sup>4</sup>*University of Belgrade, Faculty of Biology, 11000 Belgrade, Serbia.*

<sup>5</sup>*Serbian Academy of Sciences and Arts, 11001 Belgrade, Serbia.*

\*Author to whom correspondence should be addressed:

Dr Danka Bukvicki;

e-mails: [dankabukvicki@gmail.com](mailto:dankabukvicki@gmail.com), [dankabukvicki@bio.bg.ac.rs](mailto:dankabukvicki@bio.bg.ac.rs),

telephone: +381-63-161-1980;

fax: +38-111-324-3603.

**Figure S1.** Part of the  $^1\text{H}$  NMR spectrum of **1** (perrottetin E) from  $\delta_{\text{H}}$  6.50-7.30 ppm

**Figure S2.** Part of the  $^{13}\text{C}$  NMR spectrum of **1** (perrottetin E) from  $\delta_{\text{C}}$  112-158 ppm

**Figure S3.** Part of the  $^{13}\text{C}$  NMR spectrum of **1** (perrottetin E) from  $\delta_{\text{C}}$  36.7-38.0 ppm

**Figure S4.** Part of the HSQC spectrum of **1** (perrottetin E) from  $\delta_{\text{H}}$  6.50-7.20 ppm and  $\delta_{\text{C}}$  112-130 ppm

**Figure S5.** Part of the HMBC spectrum of **1** (perrottetin E) from  $\delta_{\text{H}}$  6.50-7.2 ppm and  $\delta_{\text{C}}$  112-160 ppm

**Figure S6.** Part of the  $^1\text{H}$  NMR spectrum of **2** (10'-hydroxyperrottetin E)  $\delta_{\text{H}}$  6.60-7.20 ppm

**Figure S7.** Part of the  $^{13}\text{C}$  NMR spectrum of **2** (10'-hydroxyperrottetin E) from  $\delta_{\text{C}}$  112-156 ppm

**Figure S8.** Part of the  $^{13}\text{C}$  NMR spectrum of **2** (10'-hydroxyperrottetin E) from  $\delta_{\text{C}}$  32-38 ppm

**Figure S9.** Part of the COSY spectrum of **2** (10'-hydroxyperrottetin E) from  $\delta_{\text{H}}$  6.50-7.30 ppm

**Figure S10.** Part of the HSQC spectrum of **2** (10'-hydroxyperrottetin E) from  $\delta_{\text{H}}$  6.55-7.20 ppm and  $\delta_{\text{C}}$  112-131 ppm

**Figure S11.** Part of the HMBC spectrum of **2** (10'-hydroxyperrottetin E) from  $\delta_{\text{H}}$  6.55-7.20 ppm and  $\delta_{\text{C}}$  112-156 ppm

**Figure S12.** Part of the  $^1\text{H}$  NMR spectrum of **3** (10,10'-dihydroxyperrottetin E) from  $\delta_{\text{H}}$  4.80-7.20 ppm

**Figure S13.** Part of the  $^{13}\text{C}$  NMR spectrum of **3** (10,10'-dihydroxyperrottetin E) from  $\delta_{\text{C}}$  112-157 ppm

**Figure S14.** Part of the COSY spectrum of **3** (10,10'-dihydroxyperrottetin E) from  $\delta_{\text{H}}$  6.50-7.30 ppm

**Figure S15.** Part of the HSQC spectrum of **3** (10,10'-dihydroxyperrottetin E) from  $\delta_{\text{H}}$  6.40-7.15 ppm and  $\delta_{\text{C}}$  112-130 ppm

**Figure S16.** Part of the HMBC spectrum of **3** (10,10'-dihydroxyperrottetin E) from  $\delta_{\text{H}}$  6.40-7.15 ppm and  $\delta_{\text{C}}$  112-156 ppm

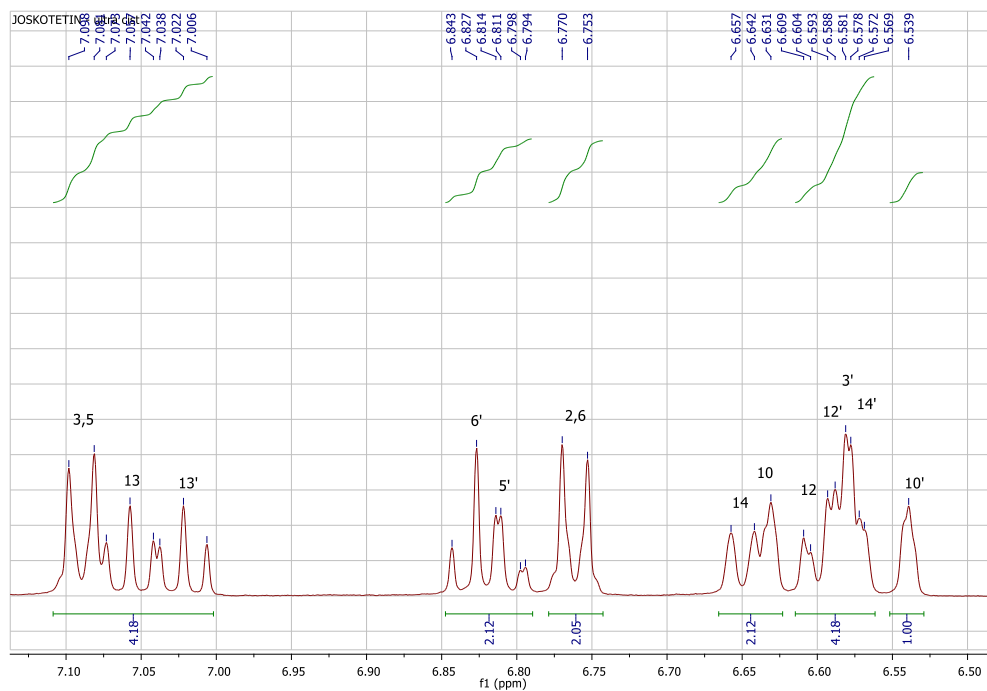

Figure S1. Part of the  $^1\text{H}$  NMR spectrum of **1** (perrottetin E) from  $\delta_{\text{H}}$  6.50-7.30 ppm

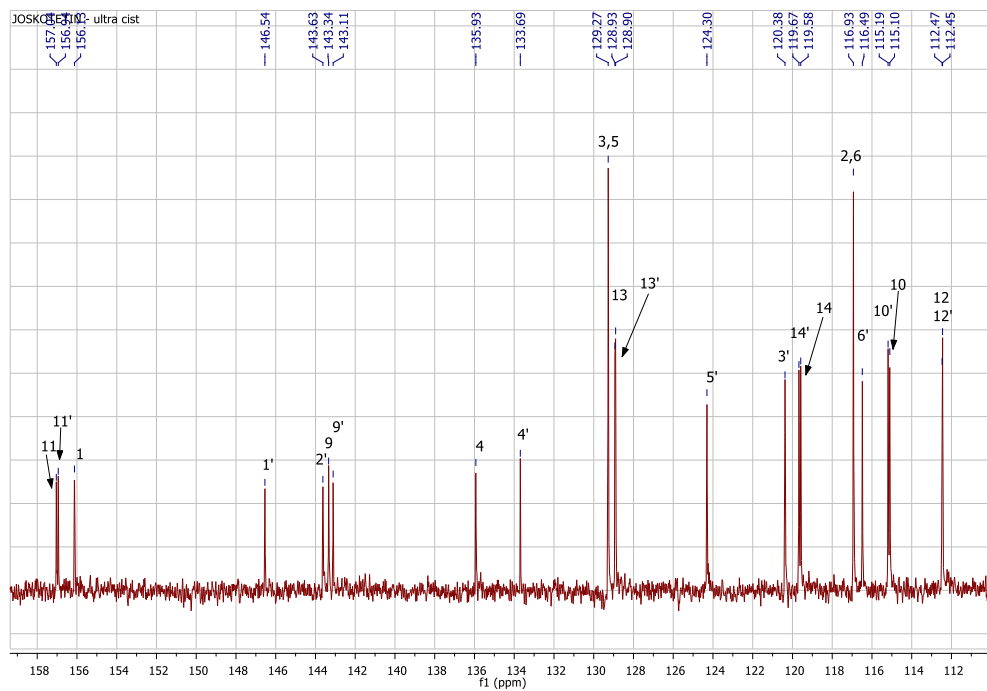

Figure S2. Part of the  $^{13}\text{C}$  NMR spectrum of **1** (perrottetin E) from  $\delta_{\text{C}}$  112-158 ppm

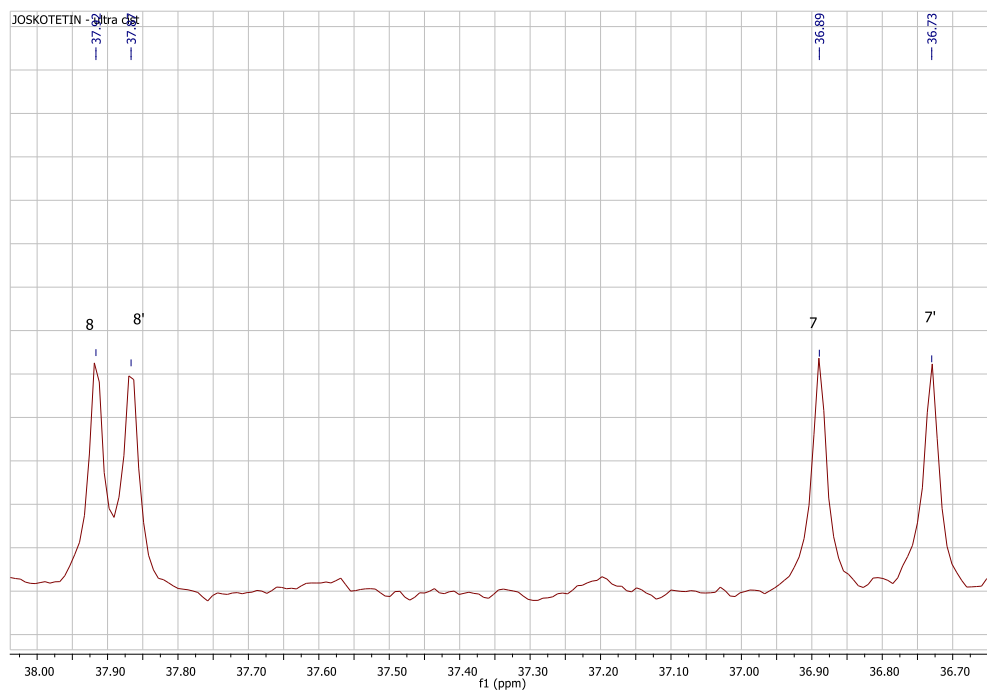

Figure S3. Part of the  $^{13}\text{C}$  NMR spectrum of **1** (perrottetin E) from  $\delta_{\text{C}}$  36.7-38.0 ppm

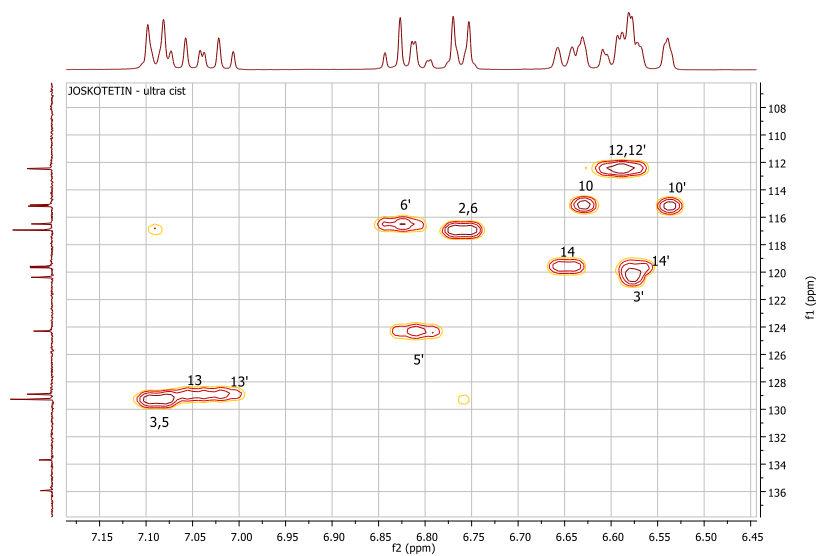

Figure S4. Part of the HSQC spectrum of **1** (perrottetin E) from  $\delta_{\text{H}}$  6.50-7.20 ppm and  $\delta_{\text{C}}$  112-130 ppm

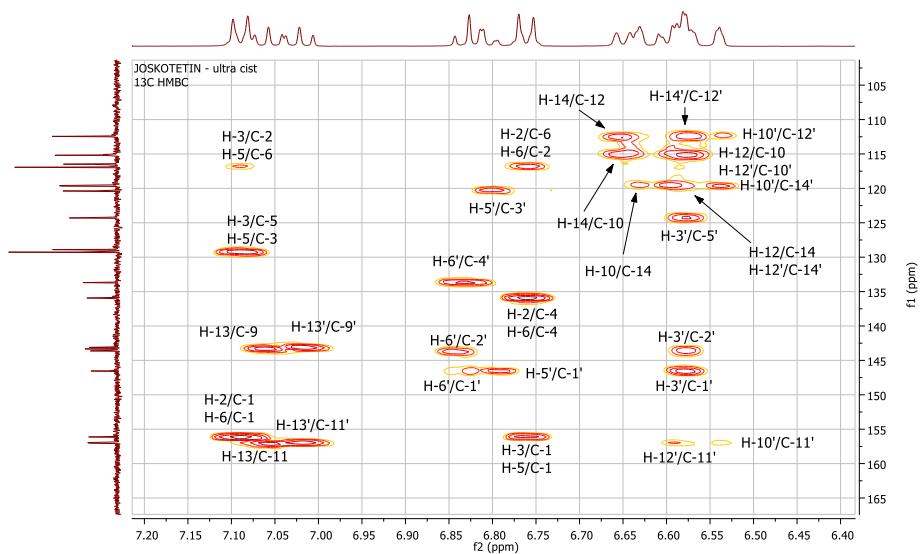

Figure S5. Part of the HMBC spectrum of **1** (perrottetin E) from  $\delta_{\text{H}}$  6.50–7.2 ppm and  $\delta_{\text{C}}$  112–160 ppm

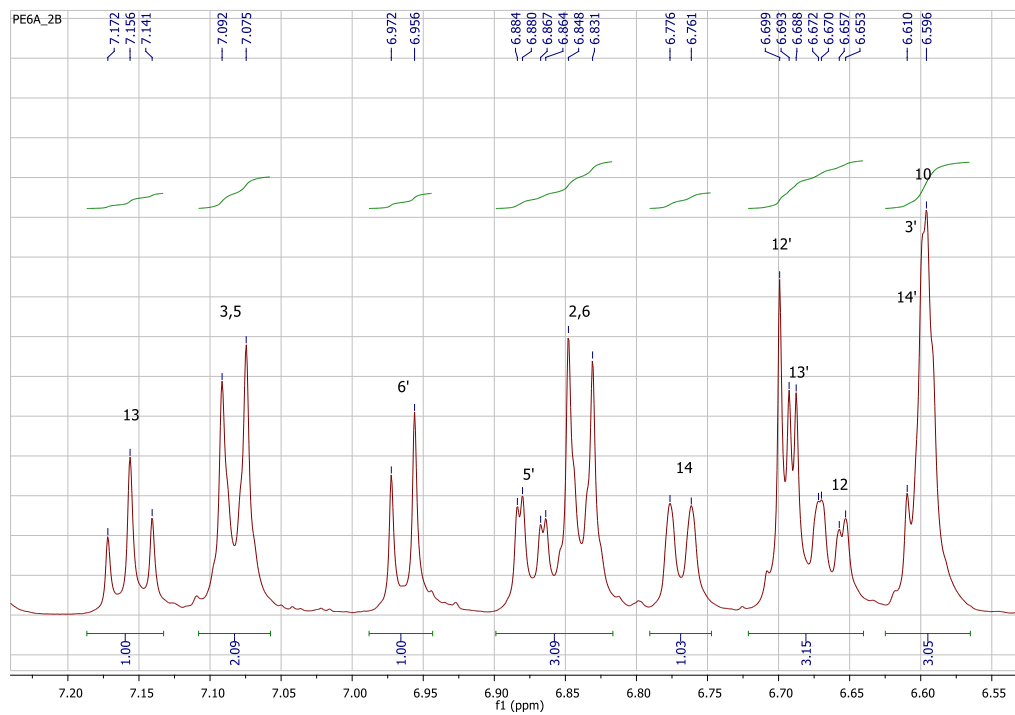

Figure S6. Part of the  $^1\text{H}$  NMR spectrum of **2** (10'-hydroxyperrottetin E)  $\delta_{\text{H}}$  6.60–7.20 ppm

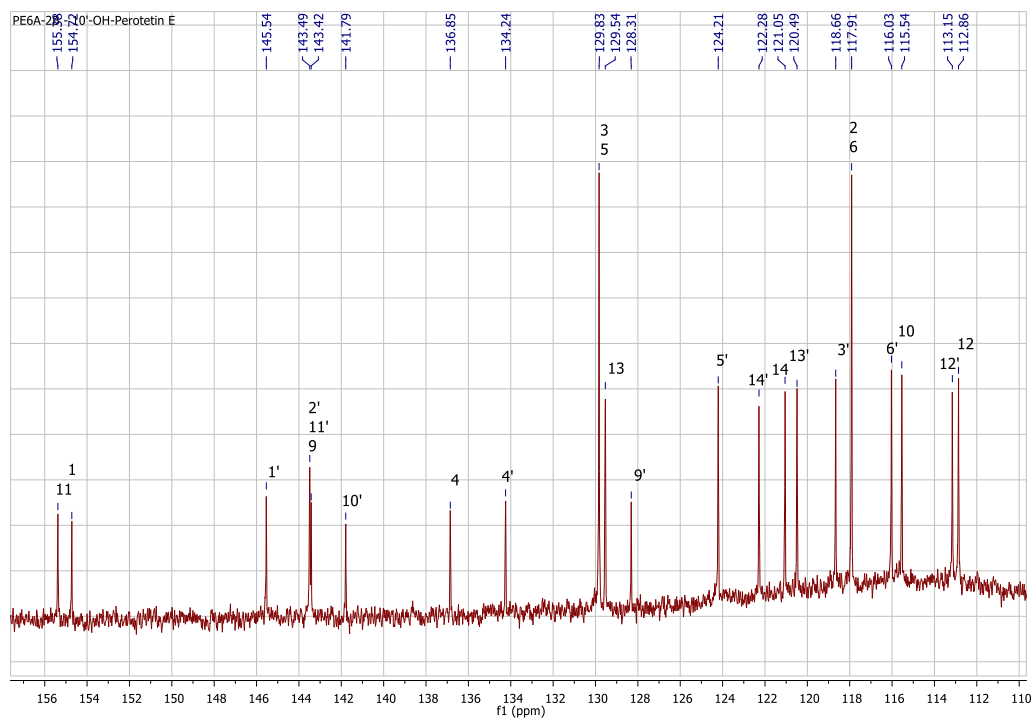

Figure S7. Part of the  $^{13}\text{C}$  NMR spectrum of **2** (10'-hydroxyperrottetin E) from  $\delta_{\text{C}}$  112-156 ppm

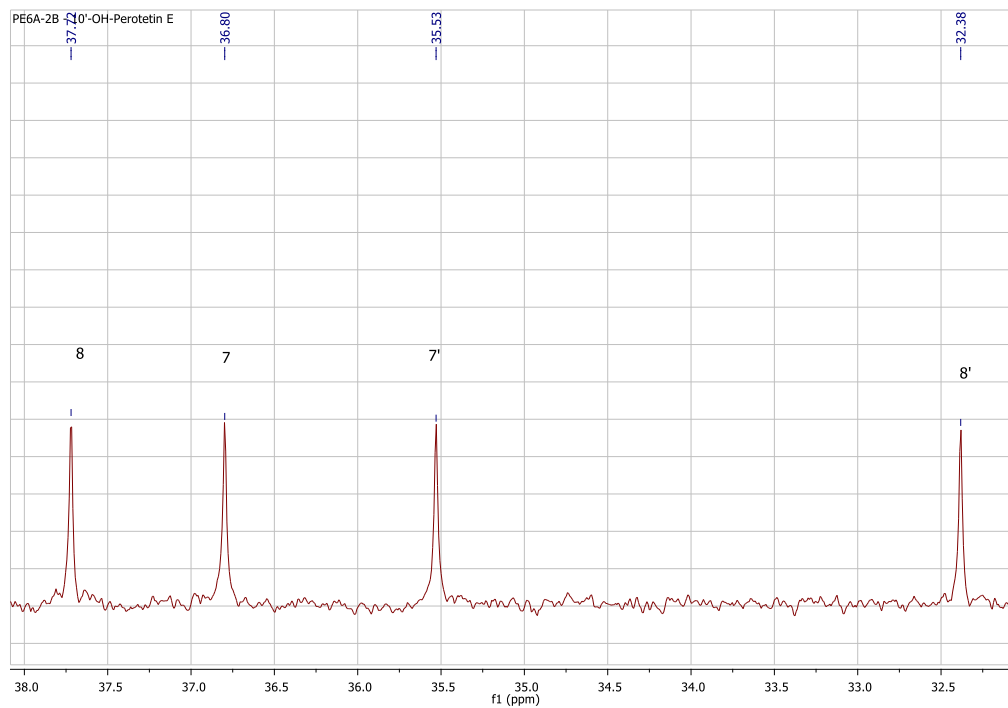

Figure S8. Part of the  $^{13}\text{C}$  NMR spectrum of **2** (10'-hydroxyperrottetin E) from  $\delta_{\text{C}}$  32-38 ppm

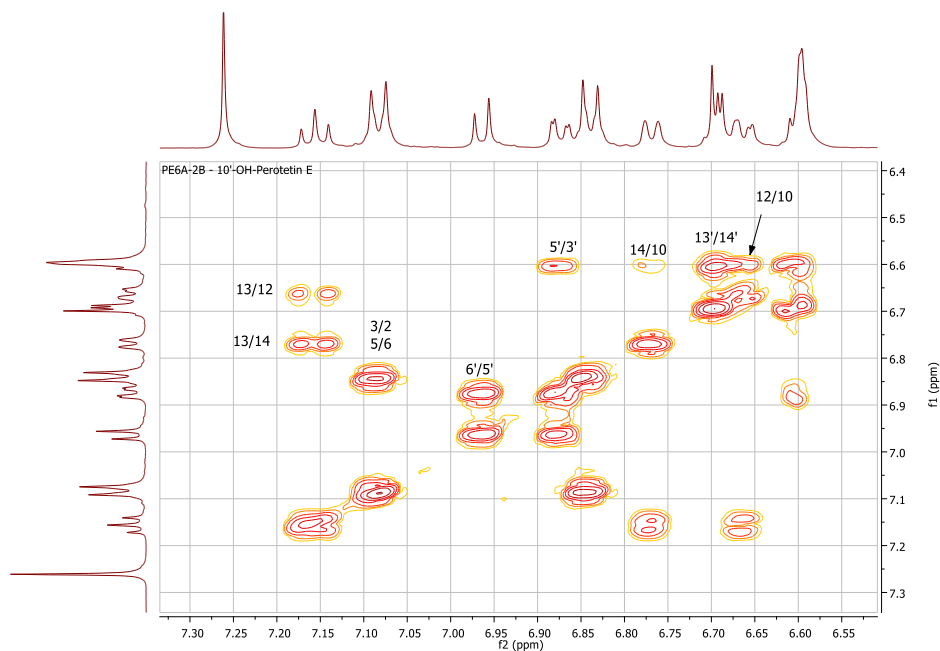

Figure S9. Part of the COSY spectrum of **2** (10'-hydroxyperrottetin E) from  $\delta_{\text{H}}$  6.50-7.30 ppm

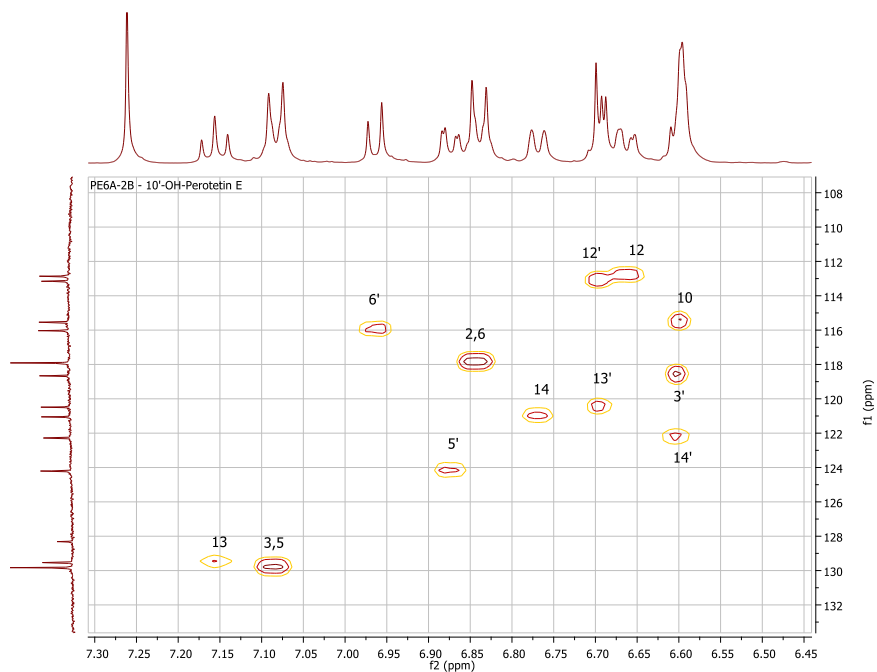

Figure S10. Part of the HSQC spectrum of **2** (10'-hydroxyperrottetin E) from  $\delta_{\text{H}}$  6.55-7.20 ppm and  $\delta_{\text{C}}$  112-131 ppm

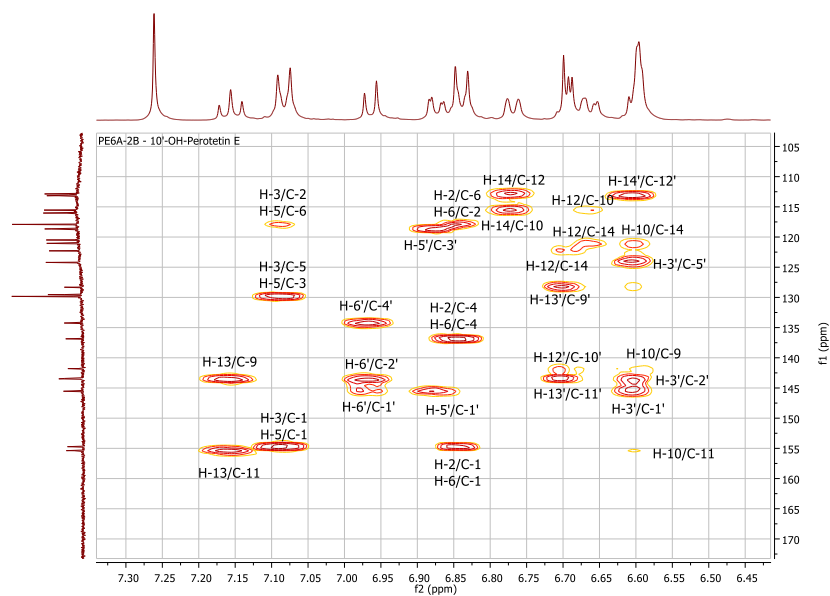

Figure S11. Part of the HMBC spectrum of **2** (10'-hydroxyperrottetin E) from  $\delta_H$  6.55-7.20 ppm and  $\delta_C$  112-156 ppm

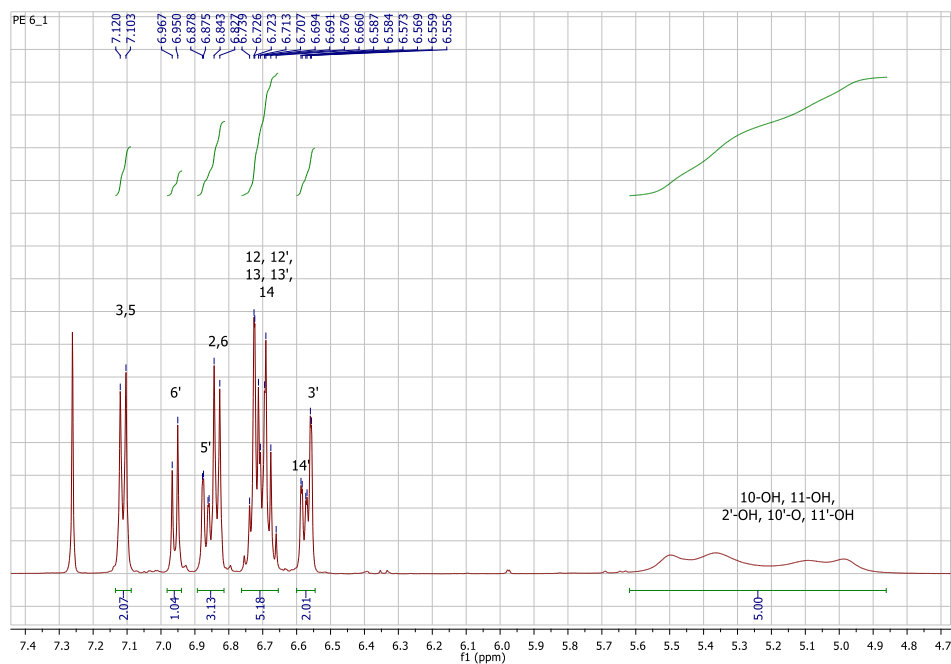

Figure S12. Part of the  $^1H$  NMR spectrum of **3** (10,10'-dihydroxyperrottetin E) from  $\delta_H$  4.80-7.20 ppm



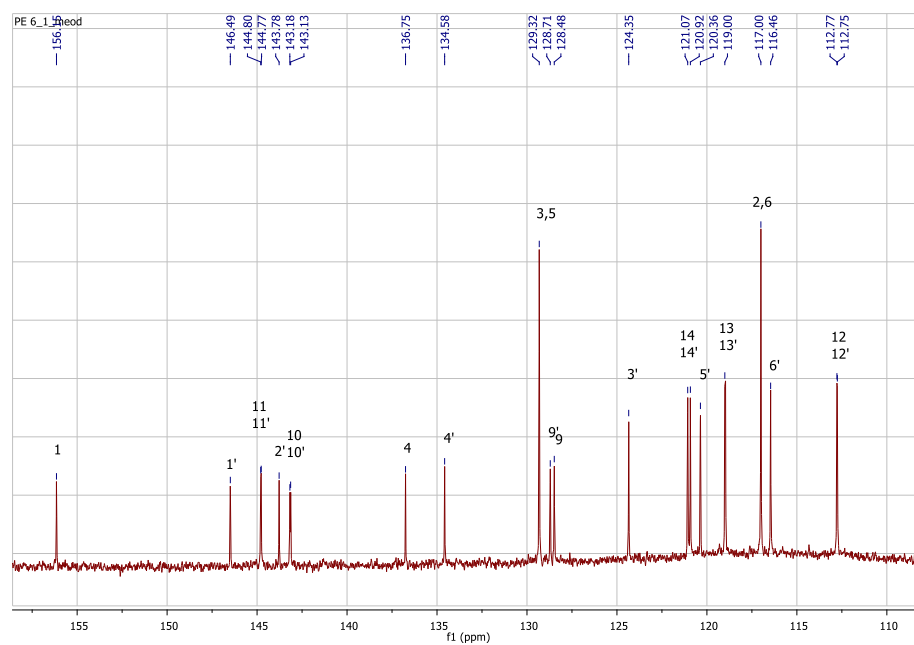

Figure S13. Part of the  $^{13}\text{C}$  NMR spectrum of **3** (10,10'-dihydroxyperrottetin E) from  $\delta_{\text{C}}$  112-157 ppm

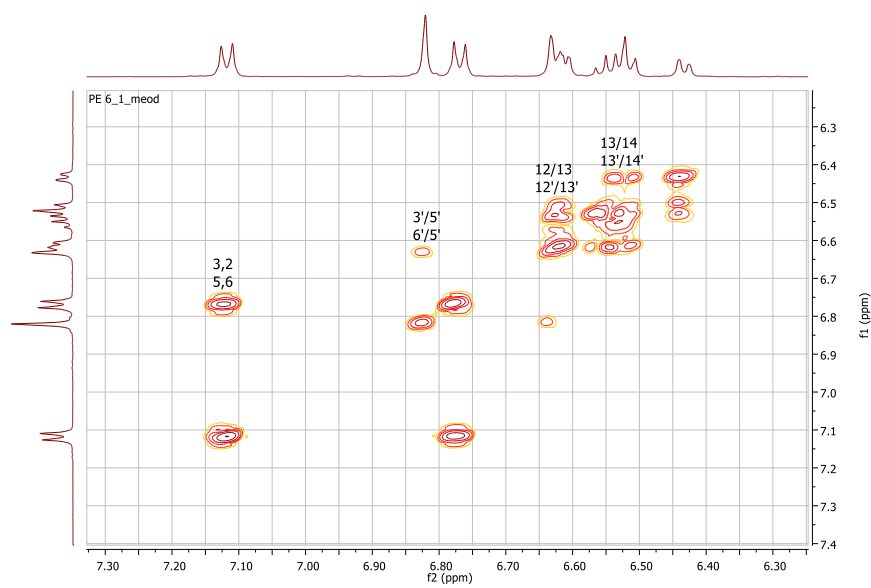

Figure S14. Part of the COSY spectrum of **3** (10,10'-dihydroxyperrottetin E) from  $\delta_{\text{H}}$  6.50-7.30 ppm

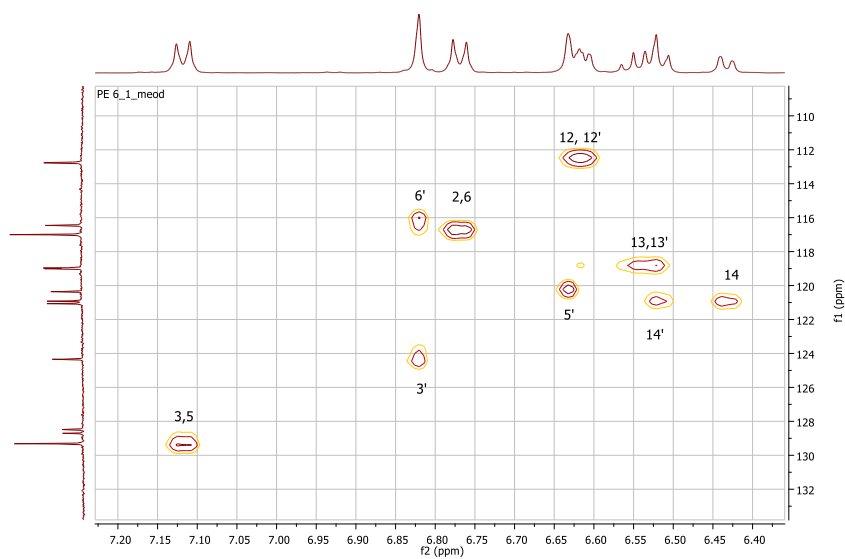

Figure S15. Part of the HSQC spectrum of **3** (10,10'-dihydroxyperrottetin E) from  $\delta_H$  6.40-7.15 ppm and  $\delta_C$  112-130 ppm

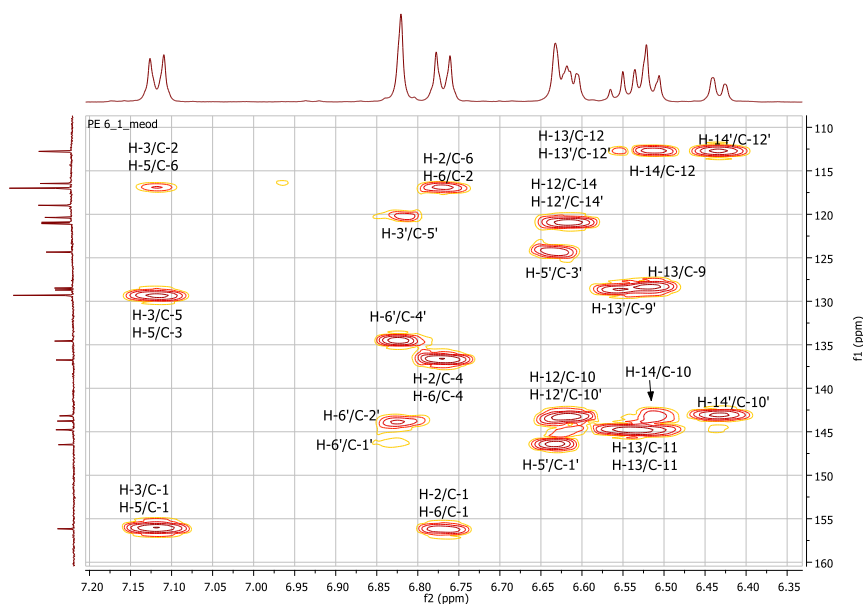

Figure S16. Part of the HMBC spectrum of **3** (10,10'-dihydroxyperrottetin E) from  $\delta_H$  6.40-7.15 ppm and  $\delta_C$  112-156 ppm
